# Supplementary material for: Competition between cyanobacteria and green algae at low versus elevated CO2: who will win, and why?
Source: PubMed Central journal article supplement (PMC5853874; doi:10.1093/jxb/erx027), 2017-02-16

## Supplementary Information

### *Competition between cyanobacteria and green algae at low versus elevated CO<sub>2</sub>: who will win, and why?*

*Xing Ji, Jolanda M. H. Verspagen, Maayke Stomp and Jef Huisman*

## Legends of Figures S1 and S2

### **Fig. S1. Dynamic changes in light, DIC and pH during the competition experiments.**

(A,B) Competition between *Monoraphidium* and *Scenedesmus*.

(C,D) Competition between *Monoraphidium* and *Chlorella*. (E,F) Competition between *Monoraphidium* and *Microcystis*. (G,H) Competition between *Microcystis* and *Scenedesmus*.

(I,J) Competition between *Microcystis* and *Chlorella*. Left panels show experiments at low pCO<sub>2</sub> (100 ppm) and right panels at high pCO<sub>2</sub> (2,000 ppm). Symbols indicate experimental data, and lines indicate model predictions. Population dynamics of the competing species are in Fig. 4 of the main text. Parameter values of the model are provided in Tables 1 and 2.

### **Fig. S2. Dynamic changes in carbon speciation during the competition experiments.**

(A,B) Competition between *Monoraphidium* and *Scenedesmus*. (C,D) Competition between *Monoraphidium* and *Chlorella*. (E,F) Competition between *Monoraphidium* and *Microcystis*.

(G,H) Competition between *Microcystis* and *Scenedesmus*. (I,J) Competition between *Microcystis* and *Chlorella*. Left panels show experiments at low pCO<sub>2</sub> (100 ppm) and right panels at high pCO<sub>2</sub> (2,000 ppm). Symbols indicate experimental data, and lines indicate model predictions. Population dynamics of the competing species are in Fig. 4 of the main text. Parameter values of the model are provided in Tables 1 and 2.

Fig. S1

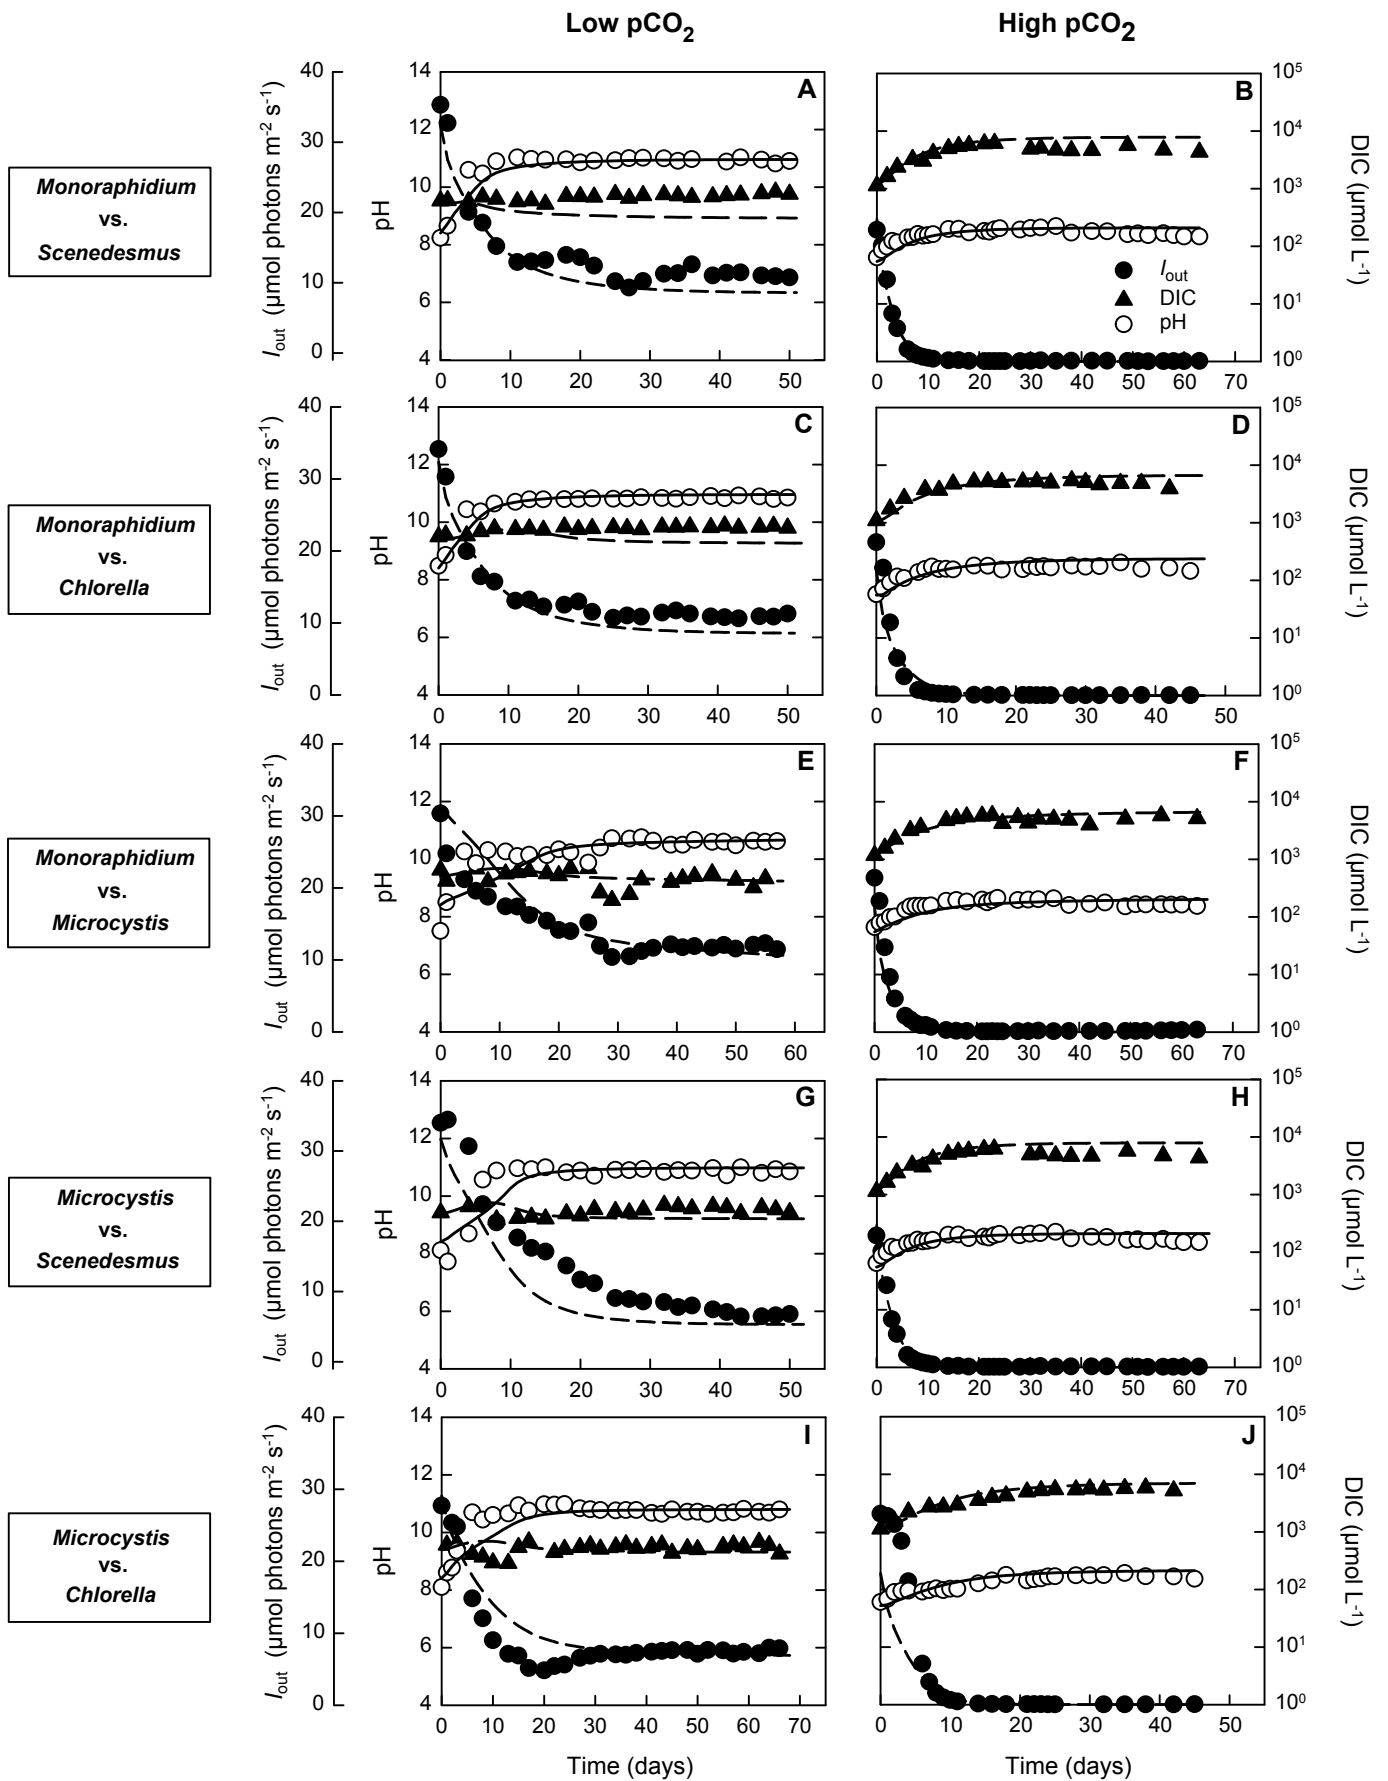

Fig. S2

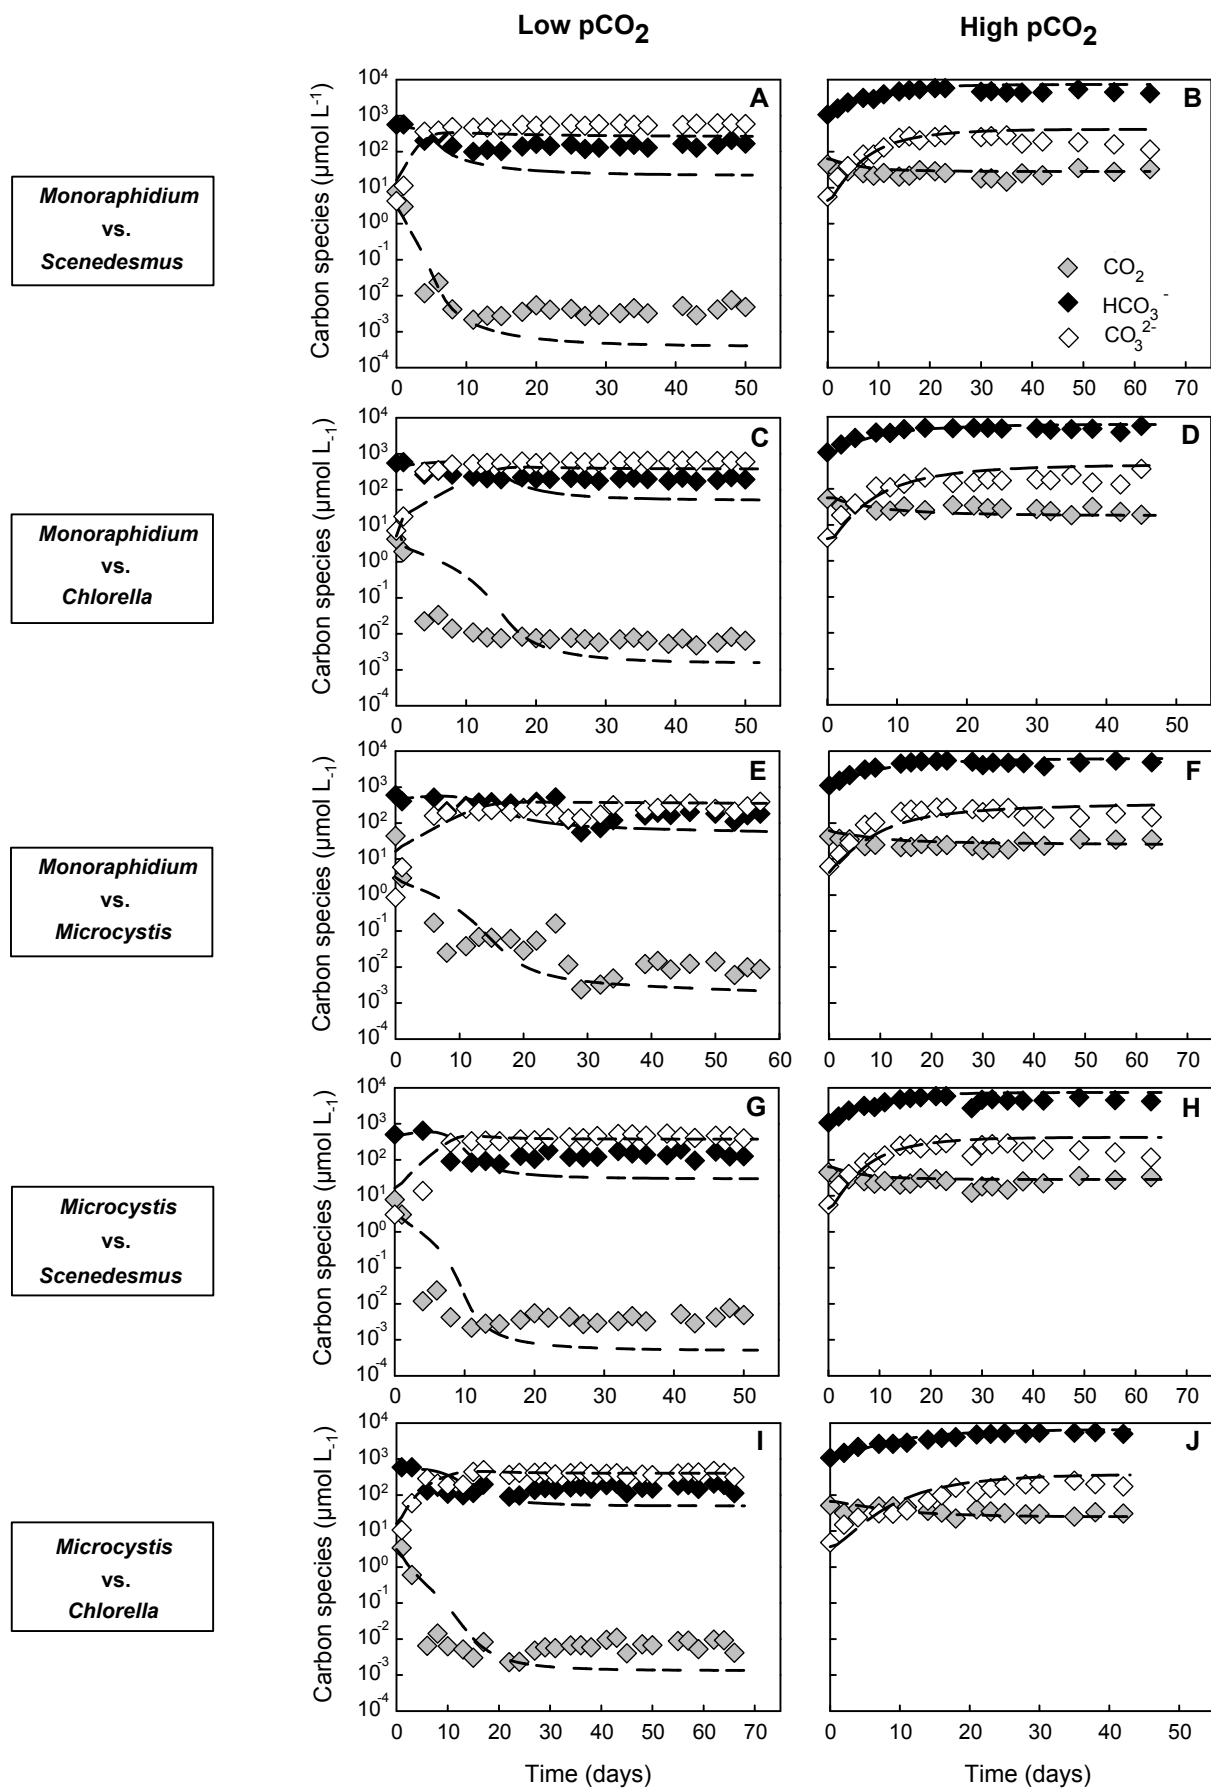

Supplement: erx027_suppl_supplementary_figures_s1_s2.pdf [file erx027_suppl_supplementary_figures_s1_s2.pdf]
