# Supplementary material for: Competition between cyanobacteria and green algae at low versus elevated CO2: who will win, and why?
Source: PubMed Central journal article supplement (PMC5853874; doi:10.1093/jxb/erx027), 2017-02-16
Supplement: erx027_suppl_supplementary_table_s1.pdf [file erx027_suppl_supplementary_table_s1.pdf]

## Supplementary Information

### *Competition between cyanobacteria and green algae at low versus elevated CO<sub>2</sub>: who will win, and why?*

Xing Ji, Jolanda M. H. Verspagen, Maayke Stomp and Jef Huisman

**Table S1.** Steady-state characteristics in the monoculture experiments.

| Parameter                                                                   | <i>Monoraphidium</i> | <i>Scenedesmus</i> | <i>Microcystis</i> | <i>Chlorella</i> |
|-----------------------------------------------------------------------------|----------------------|--------------------|--------------------|------------------|
| Population density (mm <sup>3</sup> L <sup>-1</sup> )                       |                      |                    |                    |                  |
| Low pCO <sub>2</sub>                                                        | 422 ± 21             | 722 ± 37           | 437 ± 12           | 370 ± 25         |
| High pCO <sub>2</sub>                                                       | 1943 ± 94            | 2556 ± 91          | 2103 ± 143         | 2353 ± 182       |
| Light penetration $I_{out}$ (μmol photons m <sup>-2</sup> s <sup>-1</sup> ) |                      |                    |                    |                  |
| Low pCO <sub>2</sub>                                                        | 7.89 ± 0.58          | 7.52 ± 0.38        | 6.24 ± 0.83        | 9.31 ± 0.29      |
| High pCO <sub>2</sub>                                                       | 0.15 ± 0.02          | 0.01 ± 0.00        | 0.01 ± 0.00        | 0.03 ± 0.01      |
| CO <sub>2</sub> (aq) (μmol L <sup>-1</sup> )                                |                      |                    |                    |                  |
| Low pCO <sub>2</sub>                                                        | 0.0048 ± 0.0013      | 0.0012 ± 0.0002    | 0.0041 ± 0.0017    | 0.0031 ± 0.0007  |
| High pCO <sub>2</sub>                                                       | 31.2 ± 2.5           | 30.4 ± 4.1         | 33.8 ± 2.9         | 29.9 ± 4.3       |
| HCO <sub>3</sub> <sup>-</sup> concentration (μmol L <sup>-1</sup> )         |                      |                    |                    |                  |
| Low pCO <sub>2</sub>                                                        | 134 ± 16             | 49 ± 3             | 123 ± 25           | 84 ± 10          |
| High pCO <sub>2</sub>                                                       | 5714 ± 86            | 7391 ± 190         | 6008 ± 141         | 6492 ± 220       |
| pH                                                                          |                      |                    |                    |                  |
| Low pCO <sub>2</sub>                                                        | 10.6 ± 0.2           | 10.8 ± 0.1         | 10.7 ± 0.1         | 10.7 ± 0.1       |
| High pCO <sub>2</sub>                                                       | 8.5 ± 0.0            | 8.6 ± 0.1          | 8.5 ± 0.0          | 8.6 ± 0.1        |
| Alkalinity (mEq L <sup>-1</sup> )                                           |                      |                    |                    |                  |
| Low pCO <sub>2</sub>                                                        | 2.01 ± 0.04          | 1.34 ± 0.10        | 1.97 ± 0.09        | 1.35 ± 0.18      |
| High pCO <sub>2</sub>                                                       | 6.24 ± 0.11          | 8.42 ± 0.18        | 6.51 ± 0.16        | 7.19 ± 0.22      |
| Cellular N:C ratio (molar ratio)                                            |                      |                    |                    |                  |
| Low pCO <sub>2</sub>                                                        | 0.11 ± 0.01          | 0.14 ± 0.00        | 0.18 ± 0.01        | 0.13 ± 0.00      |
| High pCO <sub>2</sub>                                                       | 0.12 ± 0.00          | 0.14 ± 0.00        | 0.19 ± 0.01        | 0.14 ± 0.00      |

The steady-state values (± SD) are based on the last 5 time points measured in each of the monoculture experiments (i.e.,  $n=5$ ).
